## INTERPOPULATION COMPARISON OF REPRODUCTION OF THE ATLANTIC SHRIMP *HIPPOLYTE OBLIQUIMANUS* (CARIDEA: HIPPOLYTIDAE)

Mariana Terossi, Ingo S. Wehrtmann, and Fernando L. Mantelatto

(MT, FLM, correspondence, flmantel@usp.br) Laboratory of Bioecology and Crustacean Systematics, Faculty of Philosophy, Sciences and Letters of Ribeirão Preto (FFCLRP), University of São Paulo (USP), Brazil;

(MT, mterossi@usp.br) Program of Post Graduation on Comparative Biology – FFCLRP (USP);

(ISW, ingowehrtmann@gmx.de) Centro de Investigación en Ciencias del Mar y Limnología (CIMAR), and Escuela de Biología, Universidad de Costa Rica, 2060 San José, Costa Rica

### ABSTRACT

The genus *Hippolyte* is represented by typically small shrimps with intriguing mechanisms of reproduction. In order to study possible variability in reproductive aspects among different populations, we conducted an exhaustive comparative study of *H. obliquimanus* from South (Brazil) and Central American (Costa Rica) waters. The study focuses on fecundity and reproductive output. Mean size of ovigerous females was significantly larger, and both mean reproductive output and mean fecundity were significantly higher in specimens from Costa Rica than in those collected in Brazil. Embryo volume was significantly smaller in the Costa Rican population, and in both populations embryos doubled their volume during embryogenesis. We discuss and compare our findings with the information available regarding *H. obliquimanus* and other hippolytid shrimp. The reproductive traits of both populations of *H. obliquimanus* show some important differences which may reflect adaptations to local environmental conditions, demonstrating a high plasticity of reproductive features of the species in Brazilian and Costa Rican waters.

**KEY WORDS:** Brazil, Costa Rica, fecundity, gonochoric, *Hippolyte obliquimanus*, reproductive output

DOI: 10.1651/09-3233.1

### INTRODUCTION

Reproduction is one of the central features in the life history of any organism. Decapod crustaceans are not only highly diverse (Martin and Davis, 2001), but also exhibit an enormous variability of reproductive strategies which can be considered as strategic adaptations to optimize lifetime fitness (Hadfield and Strathmann, 1996; Yoshino et al., 2002).

Considerable efforts have been undertaken to document and study the intraspecific plasticity of reproductive features in marine (Jones and Simons, 1983; Clarke, 1987; Wehrtmann and Kattner, 1998; Hernáez, 2001; Lardies and Wehrtmann, 2001; Brante et al., 2003; Ituarte et al., 2006; Castilho et al., 2007; Lardies et al., 2008) and freshwater decapods (Mashiko, 1987; Yam and Dudgeon, 2005; Ituarte et al., 2007). The underlying mechanisms responsible for these variations are currently the subject of debate (Berrigan and Charnov, 1994; Blanckenhorn and Demont, 2004), but evolutionary forces as well as regional and local environmental conditions seem to exert an important influence in shaping life-history traits along a species' geographical distribution (Vernberg, 1962).

Species covering a wide range of geographical distribution are especially suited to study interpopulational variability (Wehrtmann and Kattner, 1998; Ituarte et al., 2006; Castilho et al., 2007; Mantelatto et al., 2010). The present study concerns *Hippolyte obliquimanus* Dana, 1852 with a known geographic distribution comprising the western Atlantic coast, from the Caribbean and along the north-south Brazilian coast from the states of Ceará to Santa Catarina (Fausto-Filho, 1975; Udekem d'Acoz, 1997; Young, 1998). As observed in other members of Hippoly-

tidae, *H. obliquimanus* can be found in shallow water associated with both seagrass and seaweed habitats (Bauer, 2004). To date, apart from its taxonomy (see below), the biological data available deal with the records of parasites (Tsukamoto, 1981, as *H. curacaoensis* Schmitt, 1924), recruitment (Bauer, 1989, as *H. curacaoensis*), description of its sexual system (Terossi et al., 2008), ecological aspects such as population features (Terossi and Mantelatto, 2010), and larval morphology (Terossi et al., in press). However, published information concerning the embryo production of the species is restricted to isolated studies in Puerto Rico (Bauer, 1991, as *H. curacaoensis*) and southern Brazil (Mantelatto et al., 1999).

Udekem d'Acoz (1997) revised the current taxonomy of this species of the genus *Hippolyte*, and postulated, based only on adult morphology, that *H. curacaoensis* from Curaçao is a junior synonym of *H. obliquimanus* from Brazilian waters. Recent genetic studies, using 16Smt and COI genes, have corroborated this hypothesis (Terossi and Mantelatto, unpublished data). In view of these findings, *H. obliquimanus* is a species covering a wide geographical range (from 38°N to 28°S), which makes it an ideal candidate to study in a comparative way life-history patterns in different populations along its geographical distribution.

Here we analyze several reproductive features (embryo number and volume; reproductive output) of *H. obliquimanus* collected in Brazil and Costa Rica, and compare the results obtained with those available for the same species from other regions. Such an interpopulational approach might provide valuable insights into the possible plasticity in reproductive aspects of a species with a wide

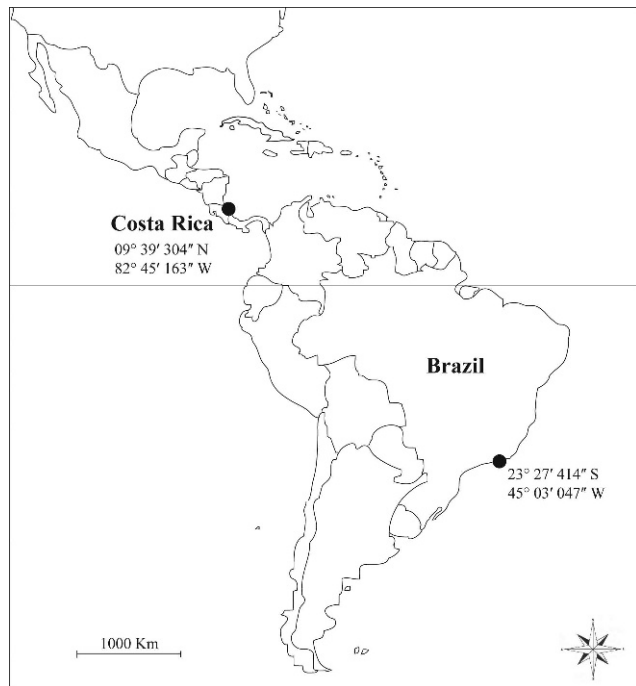

Fig. 1. The locations of the study sites in Costa Rica (Cahuita Beach, Limón) and Brazil (Itaguá Beach, Ubatuba, State of São Paulo).

geographical distribution, and the results will broaden our still-limited knowledge about the life-history traits of this small, but locally abundant, caridean shrimp. In addition, the information about the variability of reproductive traits constitutes an excellent complementary tool that can help to solve some of the existing taxonomic problems among many groups of decapods (Mathews et al., 2002; Mantelatto et al., 2009). Therefore, and considering the two populations of *H. obliquimanus* studied by us (Brazil and Costa Rica), here we test the hypothesis that: 1) ovigerous females attain larger sizes in the southern population, 2) embryo number increases and embryo volume decreases toward lower latitudes (Costa Rica), and 3) reproductive output decreases with increasing latitude.

#### MATERIALS AND METHODS

Ovigerous females were collected during 2007 (March, May and September) and 2009 (January) at Itaguá Beach (Ubatuba, State of São Paulo, Brazil), and monthly during 2002-2003 at Cahuita Beach (Limón, Costa Rica) (Fig. 1). In Brazil, specimens were obtained in a water depth of approximately one meter, from seaweed (*Sargassum* sp.), which was lifted by hand and stored in plastic bags. In the case of the material from Costa Rica, the females were obtained from seagrass meadows dominated by the turtle grass (*Thalassia testudinum*), using a push net. In both sampling locations, after the collection of the material, ovigerous females were separated and preserved immediately in ethanol (80%). Carapace length (CL) was measured from the posterior margin of the ocular orbit to the posterior margin of the carapace. The developing embryos were classified according to the criteria proposed by Wehrtmann (1990): Stage I – embryos with uniform yolk; Stage II – eye pigment visible; Stage III – eyes clearly visible, free abdomen. All embryos were detached from the females and counted; 15 embryos of each female were separated arbitrarily, and the smallest ( $a_1$ ) and the largest axes ( $a_2$ ) were measured to calculate the embryo volume ( $V$ ) according to the formula  $V = (\pi \times (a_1)^2 \times a_2)/6$  (Turner and Lawrence, 1979). These measurements were made under a stereomicroscope equipped with a calibrated ocular micrometer.

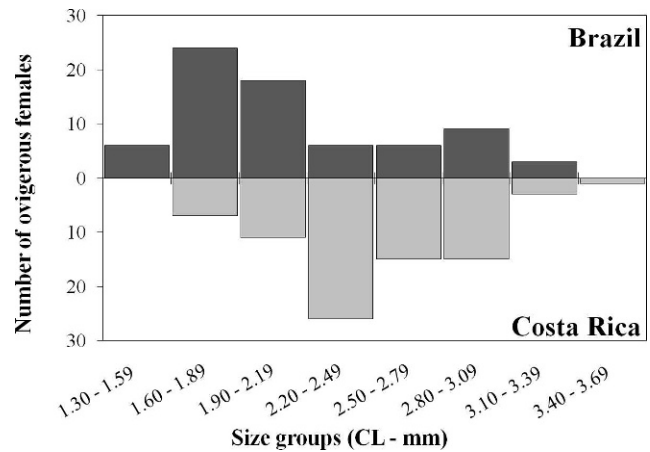

Fig. 2. *Hippolyte obliquimanus*. Size groups (carapace length: CL) of the ovigerous females collected in Costa Rica ( $n = 78$ ) and Brazil ( $n = 72$ ).

Since embryo loss during the incubation period is a well-known phenomenon in decapods (Kuris, 1991), only females with recently extruded embryos (Stage I), and with their pleopods filled with attached embryos were used to estimate fecundity. Data from females carrying embryos in Stage II and III were used only to analyze both the possible embryo volume increase and embryo loss during embryogenesis. We calculated the percentage of embryo volume increase and embryo loss among the stages by comparing the respective mean values per stage.

Females and their entire embryo mass were dried at 60°C for 24 h; they were then weighed on an analytical balance (AT 21 Comparator) with a precision of 1 µg. We calculated the reproductive output (RO, only females with embryos in Stage I) according to the formula proposed by Clarke (1987):  $RO = \text{total dry weight of embryos} / \text{dry weight of female without embryos}$ .

Statistical analyses were carried out using Statistic 8.0. The Kolmogorov-Smirnov test was applied to test for normality of samples. Analysis of variance (ANOVA) was used to compare the size of ovigerous females between populations. Regression analyses were applied to study the relation between carapace length and fecundity. Analysis of covariance (ANCOVA) was used to compare the embryo number and embryo volume between the sampling periods in Brazil (2007 and 2009) and Costa Rica (2002-2003), between the developmental stages of the embryos, and between the populations, always using CL as covariate. ANCOVA also was used to compare the embryo weight between the populations, using female weight as covariate. Voucher specimens were deposited at the Crustacean Collection of the Biology Department of FFCLRP, University of São Paulo, Brazil (CCDB/FFCLRP/USP, accession numbers: 2655 and 2656).

#### RESULTS

##### Size of Ovigerous Females

In total, 150 ovigerous females were analyzed, 72 from Brazil and 78 from Costa Rica. Both populations showed non-normal distribution (Brazil: K-S  $d = 0.20$ , Costa Rica K-S  $d = 0.17 - P < 0.01$ ). Brazilian individuals ranged in size from 1.40 to 3.30 mm CL, those from Costa Rica varied between 1.70 and 3.00 mm CL. Mean female size was significantly larger in specimens from Costa Rica than in those collected in Brazil (Brazil:  $2.09 \pm 0.47$  mm; Costa Rica:  $2.43 \pm 0.40$  mm; ANCOVA on Ranks:  $H = 21.650$ ;  $P < 0.001$ ). We analyzed the size-frequency distribution of the ovigerous females from both populations (Fig. 2): in Brazil, most individuals (58%) were found in the size range from 1.60 to 2.10 mm CL, and 33% of the Costa Rican population measured between 2.20 and 2.40 mm CL.

Table 1. *Hippolyte obliquimanus*. Fecundity and embryo volume of specimens from the Brazilian and Costa Rican populations ( $\bar{x} \pm$  SD: mean  $\pm$  standard deviation; Min and Max: minimum and maximum values).

| Stages | n  | Brazil           |     |     |                                  |       |       | Costa Rica       |               |     |                                  |                   |       |       |
|--------|----|------------------|-----|-----|----------------------------------|-------|-------|------------------|---------------|-----|----------------------------------|-------------------|-------|-------|
|        |    | Fecundity        |     |     | Embryo volume (mm <sup>3</sup> ) |       |       | Fecundity        |               |     | Embryo volume (mm <sup>3</sup> ) |                   |       |       |
|        |    | $\bar{x} \pm$ SD | Min | Max | $\bar{x} \pm$ SD                 | Min   | Max   | $\bar{x} \pm$ SD | Min           | Max | $\bar{x} \pm$ SD                 | Min               | Max   |       |
| I      | 36 | 141 $\pm$ 89     | 32  | 366 | 0.015 $\pm$ 0.004                | 0.009 | 0.021 | 43               | 187 $\pm$ 103 | 49  | 454                              | 0.012 $\pm$ 0.002 | 0.007 | 0.017 |
| II     | 21 | 94 $\pm$ 59      | 24  | 232 | 0.025 $\pm$ 0.006                | 0.018 | 0.035 | 14               | 121 $\pm$ 78  | 24  | 320                              | 0.018 $\pm$ 0.004 | 0.012 | 0.024 |
| III    | 15 | 70 $\pm$ 42      | 16  | 154 | 0.031 $\pm$ 0.007                | 0.021 | 0.042 | 21               | 118 $\pm$ 87  | 16  | 416                              | 0.026 $\pm$ 0.006 | 0.016 | 0.041 |

### Embryo Production

There was no significant difference regarding embryo production (number and volume) between the sampling periods in Brazil (ANCOVA, fecundity: slope  $F = 0.10$ , Y-intercept  $F = 0.23$ ; embryo volume: slope  $F = 1.23$ , Y-intercept  $F = 1.15$ ;  $P > 0.05$ ) and Costa Rica (ANCOVA, fecundity: slope  $F = 2.07$ , Y-intercept  $F = 1.68$ ; embryo volume: slope  $F = 0.36$ , Y-intercept  $F = 2.34$ ;  $P > 0.05$ ). Therefore, we decided to pool the data for further analyses.

Embryo number and volume with respect to the developmental stage of the embryos are shown in Table 1. In Brazil, the fecundity (Stage I) ranged between 32 and 366 embryos, and in Costa Rica between 49 and 454 embryos. In both populations, embryo production (Stage I) increased significantly with female size (Fig. 3a). The slopes of the two regression lines (Brazil – Costa Rica) were not significantly different ( $F = 1.91$ ,  $P = 0.17$ ). However, the Y-intercepts were significantly different ( $F = 4.66$ ,  $P = 0.03$ ), indicating that fecundity (Stage I) was significantly higher in specimens from Costa Rica compared to those collected in Brazil.

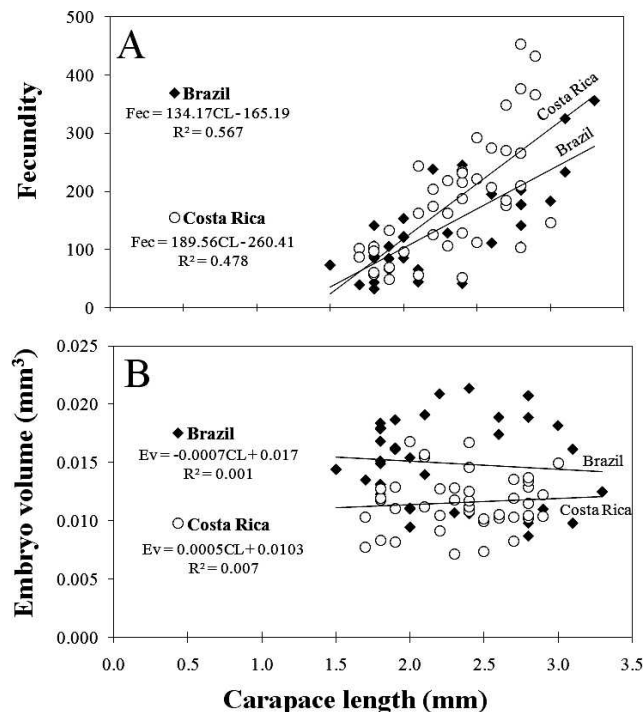

Fig. 3. *Hippolyte obliquimanus*. Linear regression between (A) carapace length (CL) and fecundity, and (B) embryo volume (Ev) for the two populations studied by us (Brazil:  $n = 36$ ; Costa Rica:  $n = 43$ ).

Volume of newly extruded embryos (Stage I) from the Brazilian and the Costa Rican populations ranged between 0.009–0.021 and 0.007–0.017 mm<sup>3</sup>, respectively (Table 1). In both populations, embryo volume (Stage I) did not change significantly with female size (Fig. 3b). The slopes of the two regression lines were not significantly different ( $F = 0.61$ ,  $P = 0.44$ ). However, significantly different Y-intercepts ( $F = 23.8$ ,  $P < 0.001$ ) indicate that embryo volume (Stage I) was significantly higher in specimens from Brazil than in those collected in Costa Rica.

### Embryo Volume Increase and Embryo Loss

In both populations, embryo volume was significantly different among the stages (see Table 2 for statistic values). Embryo volume increased during embryogenesis by 105.4% and 120.7% in the Brazilian and the Costa Rica populations, respectively. The largest volume increase occurred with 68.5% (Brazil) and 56.0% (Costa Rica) during the early embryo development (Stage I-II). At the end of the incubation period (Stage III), females carried significantly fewer embryos than at the beginning (Stage I) (see Table 2 for statistic values). During embryogenesis, females lost 50.0% (Brazil) and 36.8% (Costa Rica) of the initially produced embryos (Table 2).

### Reproductive Output (RO)

The RO varied widely: between 0.03–0.21 and 0.08–0.31 in Brazil and Costa Rica, respectively. Mean RO was higher in Costa Rica ( $0.17 \pm 0.05$  SD) than in females from the Brazilian population ( $0.13 \pm 0.06$  SD). While the embryo weight in the Costa Rican population increased significantly with female weight (Fig. 4a,  $P < 0.05$ ), we did not detect any significant relation between these variables in specimens from the Brazilian population (Fig. 4a). The slopes of the two regression lines (Brazil vs. Costa Rica) were significantly different ( $F = 8.27$ ,  $P < 0.001$ ). RO decreased with the size of ovigerous females in the Brazilian population (Fig. 4b).

### DISCUSSION

The reproductive traits of both populations of *H. obliquimanus* showed some important differences which may reflect adaptations to local environmental conditions, resulting in a high plasticity of reproductive features of the species in Brazilian and Costa Rican waters.



Table 2. *Hippolyte obliquimanus*. Values of embryo volume increase and embryo loss between stages of development in Brazilian and Costa Rican populations, and values of ANCOVA test.

| Stages |              | Embryo volume increase |                         | Embryo loss           |                        |
|--------|--------------|------------------------|-------------------------|-----------------------|------------------------|
|        |              | Brazil                 | Costa Rica              | Brazil                | Costa Rica             |
| I-II   | %            | 68.5*                  | 56.0*                   | 32.8                  | 35.4                   |
|        | Slope        | $F = 0.58, P = 0.45$   | $F = 1.69, P = 0.20$    | $F = 0.22, P = 0.65$  | $F = 0.07, P = 0.79$   |
|        | Y- intercept | $F = 57.05, P < 0.001$ | $F = 60.12, P < 0.001$  | $F = 0.13, P = 0.72$  | $F = 1.91, P = 0.17$   |
| II-III | %            | 21.9*                  | 41.4*                   | 25.7                  | 2.1                    |
|        | Slope        | $F = 0.02, P = 0.88$   | $F = 0.01, P = 0.94$    | $F = 0.13, P = 0.70$  | $F = 0.33, P = 0.57$   |
|        | Y- intercept | $F = 6.23, P = 0.01$   | $F = 13.29, P < 0.001$  | $F = 1.78, P = 0.19$  | $F = 2.26, P = 0.57$   |
| I-III  | %            | 105.4*                 | 120.7*                  | 50.0*                 | 36.8*                  |
|        | Slope        | $F = 0.62, P = 0.44$   | $F = 1.25, P = 0.27$    | $F = 3.35, P = 0.07$  | $F = 1.45, P = 0.36$   |
|        | Y- intercept | $F = 93.61, P < 0.001$ | $F = 154.21, P < 0.001$ | $F = 11.59, P = 0.01$ | $F = 14.12, P < 0.001$ |

\* Significant % of increase or loss,  $P < 0.05$ .

### Ovigerous Females

There is a trend toward decreasing size of organisms with decreasing latitude (Atkinson and Sibly, 1997; Roy and Martien, 2001; Meiri and Dayan, 2003), which would confirm results on intraspecific latitudinal variation in decapods (Castilho et al., 2007). Nevertheless, our data for *H. obliquimanus* contradict this tendency: the mean size of embryo-bearing females from Costa Rica (09°N) was significantly larger than that from the Brazilian population (23°S). The available data (Table 3), however, cover only part of the known geographical distribution of the species (Udekem d'Acoz, 1997), and especially data regarding the

size of ovigerous females from the northern part of its distribution are still lacking. A more complete set of size data over the entire geographical range of *H. obliquimanus* would allow us to study latitudinal trends in the reproductive ecology of this hippolytid shrimp (Bauer, 1992; Castilho et al., 2007).

### Embryo Production

Hippolytid shrimps are known to produce on average between 25 and 431 embryos (Corey and Reid, 1991). A few studies have reported on the fecundity of *H. obliquimanus* (Table 3), and average embryo production ranged between 64 and 187 embryos. Our data fit well into this range, and the 187 embryos of the Costa Rican population is so far the highest fecundity recorded for this species. Interestingly, Mantelatto et al. (1999) studied the embryo production of *H. obliquimanus* in the same area as our sampling location in Brazil, but reported a substantially lower mean fecundity (64 embryos) compared to the data from the Brazilian population studied by us (141 embryos). A possible explanation for such a conspicuous difference might be related to the fact that these authors included all females with embryos, including those which probably were just in the process of extruding their embryos and, thus, carried only one or two embryos (Mantelatto et al., 1999: see Fig. 2). In our study, only females with the pleonal chamber filled with embryos were used to estimate mean fecundity in the species, and this methodological difference probably resulted in a higher mean fecundity than that reported by Mantelatto et al. (1999). However, it is important to note that we found in our set of collected specimens in Brazil two females (CL = 1.8 mm) carrying only six-seven newly extruded embryos, but these were not used in our analyses. Therefore, it is important that future studies use only females with the pleonal chamber filled with embryos to obtain reliable values for comparable fecundity.

The mean embryo number of *H. obliquimanus* seems to increase with decreasing latitude, associated with a concurrent decrease of the mean embryo volume (Table 3). A similar trend of smaller but more numerous embryos toward lower latitudes has been mentioned for a number of decapods (Jones and Simons, 1983; Clarke et al., 1991; Lardies and Castilla, 2001; Lardies and Wehrmann, 2001). Temperature is considered as an important environmental

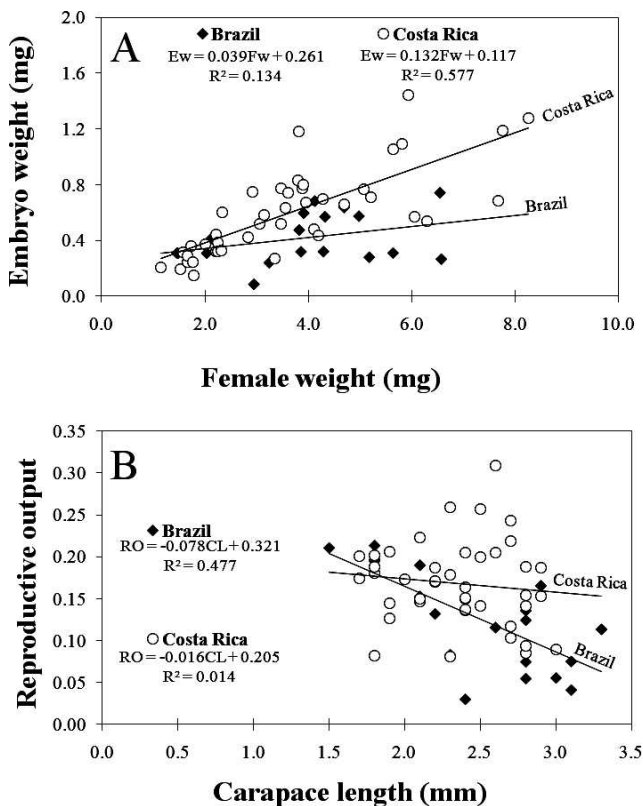

Fig. 4. *Hippolyte obliquimanus*. Linear regression between (A) female weight (Fw) and embryo weight (Ew), and between (B) carapace length (CL) and reproductive output (RO) for the two populations studied by us (Brazil:  $n = 20$ ; Costa Rica:  $n = 43$ ).

Table 3. Reproductive aspects of different species of the Family Hippolytidae from Americas.

| Species                                                      | N   | CL (mm)<br>x ± SD | Fecundity<br>x ± SD | Embryo volume<br>(mm <sup>3</sup> ) x ± SD | r    | Embryo volume<br>increase (%) | Embryo<br>loss (%) | Locality                          | Reference                             |
|--------------------------------------------------------------|-----|-------------------|---------------------|--------------------------------------------|------|-------------------------------|--------------------|-----------------------------------|---------------------------------------|
| <i>Hippolyte nicholsoni</i><br>Chace, 1972                   | 4   | 0.96              | 25                  | 0.018                                      | 0.97 | ns                            | ns                 | U.S.A. (27°42'N,<br>80°34'W)      | Corey and Reid<br>1991                |
| <i>Hippolyte obliquimanus</i><br>Dana, 1852                  | 43  | 2.43 ± 0.40       | 187 ± 103           | 0.012                                      | 0.69 | 120.7                         | 36.8               | Costa Rica (09°39'N,<br>82°45'W)  | Present study                         |
|                                                              | 131 | 2.4 ± 0.3         | 153 ± 70            | 0.005                                      | 0.87 | –                             | –                  | Puerto Rico (18°29'N,<br>66°15'W) | Bauer 1991*                           |
|                                                              | 36  | 2.09 ± 0.47       | 141 ± 89            | 0.015                                      | 0.73 | 105.4                         | 50.0               | Brazil (23°27'S,<br>45°03'W)      | Present study                         |
|                                                              | 108 | 4.7 ± 0.6**       | 64 ± 46             | 0.020                                      | 0.61 | –                             | –                  | Brazil (23°30'S,<br>45°06'W)      | Mantelatto et al.<br>1999             |
| <i>Hippolyte zostericola</i><br>(Smith, 1873)                | 22  | 2.77              | 147                 | 0.037                                      | 0.82 | ns                            | 50                 | U.S.A. (27°44'N,<br>80°24'W)      | Corey and Reid<br>1991                |
|                                                              | 100 | 2.4 ± 0.26        | 104 ± 41            | –                                          | –    | –                             | –                  | Mexico (18°30'N,<br>92°00'W)      | Negreiros-<br>Fransozo<br>et al. 1996 |
| <i>Latreutes fucorum</i><br>(Fabricius, 1798)                | 19  | 3.16              | 127                 | 0.030                                      | 0.82 | 23                            | 74                 | U.S.A. (27°42'N,<br>80°34'W)      | Corey and Reid<br>1991                |
|                                                              | 98  | 2.3 ± 0.3         | 57 ± 24             | 0.012                                      | 0.77 | –                             | –                  | Puerto Rico (18°29'N,<br>66°15'W) | Bauer 1991                            |
| <i>Latreutes parvulus</i><br>(Stimpson, 1866)                | 78  | 2.0 ± 0.2         | 59 ± 23             | 0.012                                      | 0.72 | –                             | –                  |                                   |                                       |
| <i>Nauticaris magellanica</i><br>(A. Milne-Edwards,<br>1891) | 159 | –                 | –                   | 0.031-0.038                                |      | 74-160                        | –                  | Chile (30-42°S,<br>71-73°W)       | Wehrmann and<br>Kattner 1998          |
| <i>Thor manningi</i> Chace,<br>1972                          | 7   | 1.62              | 37                  | 0.036                                      | 0.77 | 117                           | ns                 | U.S.A. (27°42'N,<br>80°34'W)      | Corey and Reid<br>1991                |
| <i>Tozeuma carolinense</i><br>Kingsley, 1878                 | 52  | 1.9 ± 0.2         | 66 ± 27             | 0.026                                      | 0.55 | –                             | –                  | Puerto Rico (18°29'N,<br>66°15'W) | Bauer 1991                            |
|                                                              | 37  | 6.79              | 190                 | 0.057                                      | 0.80 | 84                            | 41                 | U.S.A. (27°44'N,<br>80°24'W)      | Corey and Reid<br>1991                |
| <i>Trachycaris restricta</i><br>(A. Milne-Edwards,<br>1878)  | 4   | 6.10              | 431                 | 0.220                                      | 0.88 | ns                            | ns                 | U.S.A. (18°N, 64°W)               |                                       |

\* As *Hippolyte curacaoensis* Schmitt, 1924.

\*\* Including the rostrum.

ns: embryo increase and embryo loss were not significant; –: data not available.

N: number of ovigerous females with newly extruded embryos; CL: carapace length; x ± SD: mean ± standard deviation; V: embryo volume; r: correlation between carapace length (CL) and embryo number.

factor in shaping life-history traits in marine decapods (Orton, 1920; Wear, 1974; Sastry, 1983), and larger embryo size is generally associated with cooler temperatures (Thorson, 1950; Laptikhovskiy, 2006). The observed difference between the embryo volume of *H. obliquimanus* between the Brazilian and the Costa Rican populations may be explained by the marked differences in local water temperatures: mean water-surface temperatures at the Brazilian sampling location are substantially lower ( $24.7 \pm 1.5^\circ\text{C}$ ; Terossi and Mantelatto, 2010) than at Cahuita ( $27\text{--}30^\circ\text{C}$ ; Nielsen-Muñoz and Cortés, 2008). But again, it should be kept in mind that information concerning embryo size is lacking for the northern regions of the geographical distribution of *H. obliquimanus*, which limits any solid conclusion concerning intraspecific variability in life history traits in this widely distributed hippolytid shrimp.

Hippolytid shrimps produce generally small embryos (Bauer, 1991; Corey and Reid, 1991), and *H. obliquimanus* is no exception: our data on the average embryo volume of recently extruded embryos of *H. obliquimanus* are within the range of values reported in the literature (Table 3). However, the published embryo volume value for a Puerto Rican population (Bauer, 1991) is substantially smaller compared to all other reports for *H. obliquimanus* (Table 3). A simple error can be ruled out, because some

embryos collected during Bauer's study (1991) in Puerto Rico were recently measured and their embryo volume calculated (R. Bauer, personal communication): the results coincided with those published by Bauer (1991). Thus, *H. obliquimanus* shows a high plasticity in its embryo volume. The underlying reasons for such intraspecific variability are unknown, but embryo size is often positively correlated with the duration of the embryonic development (Steele and Steele, 1975; Steele, 1977; Bauer, 1991). The available data for this hippolytid shrimp, maintained in the laboratory, confirm this correlation: the incubation period of *H. obliquimanus* in Brazil lasts around 10-12 days (Terossi et al., 2008) versus four days in the Puerto Rican population (Bauer, 1991). Data about the duration of the incubation period of the species in Costa Rica are not available. It might be speculated that the relatively short life span (< one year; Bauer, 1991) together with an intense predation pressure (Bauer, 1991) and relatively stable environmental conditions resulted in a continuous and intense production of extremely small embryos in the Puerto Rican population. However, it cannot be ruled out that the population studied by Bauer (1991) was comprised by a morphologically similar (identical?) but genetically distinct species (R. Bauer, personal communication). Future morphological and molecular work will be required

Table 4. Reproductive output data available for different caridean families from Americas.

|              | Species                                             | N   | CL (mm)   | Reproductive output | Locality                                   | Reference                  |
|--------------|-----------------------------------------------------|-----|-----------|---------------------|--------------------------------------------|----------------------------|
| Alpheidae    | <i>Alpheus armillatus</i> H. Milne Edwards, 1837    | 31  | 7.7-14.1  | 0.048-0.179         | Brazil (23°44'S, 45°24'W)                  | Pavanelli et al. 2008      |
|              | <i>Alpheus nuttingi</i> (Schmitt, 1924)             | 17  | 8.3-18.6  | 0.039-0.123         |                                            | Pavanelli et al. 2010      |
|              | <i>Alpheus saxidomus</i> Holthuis, 1981             | 35  | 7.8-29.5  | 0.44*               | Costa Rica (5°32'N, 87°04'W)               | Wehrtmann unpubl. data     |
|              | <i>Betaeus emarginatus</i> (H. Milne Edwards, 1837) | 38  | 9.0-16.3  | 0.09*               | Chile (39°49'S, 73°25'W)                   | Lardies and Wehrtmann 1997 |
|              | <i>Betaeus truncatus</i> (Dana, 1852)               | 34  | 8.36      | 0.07*               | Chile (30°07'S, 71°26'W)                   | Lardies and Wehrtmann 2001 |
|              |                                                     |     | 24        | 7.11                | 0.13*                                      | Chile (41°35'S, 72°43'W)   |
| Hippolytidae | <i>Hippolyte obliquimanus</i> Dana, 1852            | 68  | 8.04      | 0.18*               | Chile (42°25'S, 73°44'W)                   |                            |
|              |                                                     | 20  | 2.09      | 0.03-0.93           | Brazil (23°27'S, 45°03'W)                  | Present study              |
|              |                                                     | 43  | 2.43      | 0.08-0.33           | Costa Rica (09°39'N, 82°45'W)              |                            |
| Pandalidae   | <i>Austropandalus grayi</i> (Cunningham, 1871)      | 96  | 17.6      | 0.07-0.24           | Chile (53°42'S, 70°57'W; 55°09'S, 67°01'W) | Wehrtmann and Lardies 1999 |
|              |                                                     | 180 | 22.1-36.5 | 0.045-0.056         | Chile (31°S, 71°W)                         | Wehrtmann and Andrade 1998 |
|              |                                                     |     |           |                     |                                            |                            |

\* No data available about the range value.

N: number of ovigerous females; CL: carapace length.

to solve the intriguing question of why the embryos of *H. obliquimanus* from Puerto Rico are so small compared to other populations of the same species.

The size of hatching larvae is related to embryo size (Strathmann, 1977). Since we detected significant differences in embryo volume between the two populations studied herein, we also expected to find differences in the hatching size (Boddeke, 1982; Wehrtmann and López, 2003). However, we did not detect any difference in the mean size of the newly hatched zoeae of *H. obliquimanus* from both areas (Terossi et al., in press). Future comparative embryological studies might reveal why considerably larger eggs from *H. obliquimanus* in Brazil did not result in larger hatchlings when compared to those from Costa Rica.

#### Embryo Volume Increase and Embryo Loss

The embryos of *H. obliquimanus* more than doubled their volume during embryogenesis, which corroborates similar observations with other decapods (Wear, 1974; Lardies and Wehrtmann, 1996, 1997; Wehrtmann and Kattner, 1998; Hernández and Palma, 2003), including those from hippolytid shrimps from Americas (Table 3): an increase of roughly 100% of the embryo volume has been reported for most of these species, with the exception of *Latreutes fucorum* (Fabricius, 1798) (23%, Bauer, 1991). The increase in embryo volume is typically related to the incorporation of large amounts of water (Pandian, 1970). These swelling embryos occupy more space than the initially produced embryos, and since space is considered as a limiting factor for brood production in decapods (Corey and Reid, 1991; Hines, 1982; Lardies and Wehrtmann, 2001), embryo loss might be expected in *H. obliquimanus*. Thus, it is not surprising that we detected embryo loss of up to 50% (Brazilian population) during the incubation period. Information on embryo loss in hippolytid shrimps is scanty, but the available data indicate values ranging from 41% to 74% (Table 3), which confirms similar findings from decapods with embryo-volume increases similar to that

observed in *H. obliquimanus* (Balasundaram and Pandian, 1982; Corey and Reid, 1991; Lardies and Wehrtmann, 2001).

#### Reproductive Output

In decapods, the energy investment in embryo production constitutes roughly 10% of the female body weight (Hines, 1982, 1988; Hernández and Palma, 2003; Miranda et al., 2006; Torati and Mantelatto, 2008). The obtained reproductive-output (RO) values for *H. obliquimanus* from the Costa Rican (0.17) and Brazilian populations (0.13) are slightly higher than this value, but similar elevated RO-values have been reported also for other caridean shrimps from Latin America (Table 4).

Clarke (1987) suggested that the RO of some hippolytid shrimps decreases with increasing latitude. Our data for *H. obliquimanus* confirm such a tendency: the mean RO value for the Costa Rican population (09°N) was higher than that from the Brazilian population (23°S) (Table 4). On the other hand, it has been suggested that lower temperatures allow a higher energy investment in embryo production (Woodward and White, 1981) compared to animals living in warmer waters (Díaz, 1980). Such a trend cannot be supported by our data, because both the mean embryo number and RO were significantly higher in the Costa Rican population. However, intraspecific variability in reproductive features cannot be explained by latitude alone; regionally and locally varying environmental conditions may contribute significantly to the observed plasticity in the reproductive biology of decapods (Kyomo, 2000; Bas et al., 2007; Castilho et al., 2007). Moreover, for a more-solid analysis of the reproductive features of *H. obliquimanus*, additional information from other locations along the known geographical distribution of the species is required.

In the Brazilian population of *H. obliquimanus*, the energy allocation for embryo production decreased with increasing female size (Fig. 4b). To the best of our knowledge, this is the first case where such a relationship between increasing female size and decreasing RO has



been detected in decapods. In general, the energy invested in the production of embryos is independent of the female body size, e.g., in *Heterocarpus reedi* Bahamonde, 1955 (Wehrmann and Andrade, 1998) and *Austropandalus grayi* (Cunningham, 1871) (Wehrmann and Lardies, 1999). Thus, further analysis are needed to verify the observed relationship of decreasing RO with increasing female size in the Brazilian population, and to search for the causal factors responsible for this unusual pattern.

In conclusion, our results demonstrated a high plasticity in embryo production of *H. obliquimanus* and confirmed our working hypothesis that embryo number increases and embryo volume decreases toward lower latitudes (Costa Rica), and that the energy allocation for reproduction (RO) decreases with increasing latitude. However, our findings did not support the hypothesis that the size of ovigerous females increases with increasing latitude (Table 3). This aspect needs further attention and confirms that several reproductive features of *H. obliquimanus* (and probably many other hippolytid species) are still unclear. A more complete subset of individuals of the same species from other areas is needed for a comprehensive examination of the reproduction in this species. The outcome of the present study should encourage future analysis of reproductive plasticity in congeners.

#### ACKNOWLEDGEMENTS

This study forms part of a Doctoral thesis by MT, and was supported by a fellowships from FAPESP (Proc. 06/61771-0), and CAPES-Doctoral-Sandwich (Proc. 1306/09). FLM and ISW are grateful to the International Cooperative Project by CNPq - Brazil (Proc. 491490/2004-6; 490353/2007-0) and CONICIT-Costa Rica (CII-001-08), and the Universidad de Costa Rica (VI No. 808-A8-209) for financial support for the visiting program in Brazil and Costa Rica. FLM is grateful to CNPq for a research fellowship (Proc. 301359/07-5). Special thanks are due to all members of the Laboratory of Bioecology and Crustacean Systematics of FFCLRP/USP for their help during field and laboratory work, and to Ray Bauer (University of Louisiana, U.S.A.) for sharing information on embryos from Puerto Rico. The support of the Postgraduate Program in Comparative Biology of FFCLRP/USP and CEBIMar/USP during fieldwork is gratefully acknowledged. All experiments conducted in this study complied with current applicable state and federal laws of Brazil (DIFAP/IBAMA, 121/05) and Costa Rica. Dr. Janet Reid (JWR Associates, U.S.A.) revised the English text. Finally, we appreciated the constructive suggestions of the anonymous referees.

#### REFERENCES

Atkinson, D., and R. M. Sibly. 1997. Why are organisms usually bigger in colder environments? Making sense of a life history puzzle. *Trends in Ecology and Evolution* 12: 235-239.

Bahamonde, N. 1955. Hallazgo de una especie nueva de *Heterocarpus*, en aguas Chilenas: *H. reedi* n. sp. *Investigaciones Zoológicas Chilenas* 2: 105-114.

Balasundaram, C., and T. J. Pandian. 1982. Egg loss during the incubation in *Macrobrachium nobilii* (Henderson & Mathai). *Journal of Experimental Marine Biology and Ecology* 59: 289-299.

Bas, C., E. D. Spivak, and K. Anger. 2007. Seasonal and interpopulational variability in fecundity, egg size, and elemental composition (CHN) of eggs and larvae in a graspid crab, *Chasmagnathus granulatus*. *Helgoland Marine Research* 61: 225-237.

Bauer, R. T. 1989. Continuous reproduction and episodic recruitment in nine shrimp species inhabiting a tropical seagrass meadow. *Journal of Experimental Marine Biology and Ecology* 127: 175-187.

———. 1991. Analysis of embryo production in a caridean shrimp guild from a tropical seagrass meadow, pp. 181-191. In, A. Wenner and A. Kuris (eds.), *Crustacean Egg Production*. A. A. Balkema, Rotterdam.

———. 1992. Testing generalizations about latitudinal variation in reproduction and recruitment patterns with sicyoniid and caridean shrimp species. *Invertebrate Reproduction and Development* 22: 193-202.

———. 2004. Remarkable Shrimps: Adaptations and Natural History of the Carideans. University of Oklahoma Press.

Blanckenhorn, W. U., and M. Demont. 2004. Bergmann and converse Bergmann latitudinal clines in arthropods: two ends of a continuum. *Integrative and Comparative Biology* 44: 413-424.

Berrigan, D., and E. L. Charnov. 1994. Reaction norms for age and size at maturity in response to temperature: puzzle for life historians. *Oikos* 70: 474-478.

Boddeke, R. 1982. The occurrence of winter and summer eggs in the brown shrimp (*Crangon crangon*) and the pattern of recruitment. *Netherlands Journal of Sea Research* 16: 151-162.

Brante, A., M. Fernández, L. Eckerle, F. Mark, H. O. Pörtner, and W. Arntz. 2003. Reproductive investment in the crab *Cancer setosus* along a latitudinal cline: egg production, embryo losses and embryo ventilation. *Marine Ecology Progress Series* 251: 221-232.

Castilho, A. L., M. A. Gavio, R. C. Costa, E. E. Boschi, R. T. Bauer, and A. Fransozo. 2007. Latitudinal variation in population structure and reproductive pattern of the endemic South American shrimp *Artemesia longinaris* (Decapoda: Penaeoidea). *Journal of Crustacean Biology* 27: 548-552.

Chace, F. A., Jr. 1972. The shrimps of the Smithsonian-Bredin Caribbean Expeditions, with a summary of the West Indian shallow-water species (Crustacea: Decapoda: Natantia). *Smithsonian Contributions to Zoology* 98: 1-179.

Clarke, A. 1987. Temperature, latitude and reproductive effort. *Marine Ecology Progress Series* 38: 89-99.

———, C. C. E. Hopkins, and E. M. Nilssen. 1991. Egg size and reproductive output in the deep-water prawn *Pandalus borealis* Krøyer, 1838. *Functional Ecology* 5: 724-730.

Corey, S., and D. M. Reid. 1991. Comparative fecundity of decapod crustaceans. I. The fecundity of thirty-three species of nine families of caridean shrimp. *Crustaceana* 60: 270-294.

Cunningham, R. O. 1871. Notes on the Reptiles, Amphibia, Fishes, Mollusca, and Crustacea obtained during the voyage of H. M. S. 'Nassau' in the years 1866-69. *Transactions of the Linnean Society of London* 27: 465-502.

Dana, J. D. 1852. *Macroura. Conspectus Crustaceorum quae in Orbitis Terrarum circumnavigatione, Carolo Wilkes e Classe Reipublicae Foederatae duce, lexit et descripsit*. *Proceedings of the Academy of Natural Science, Philadelphia* 6: 10-28.

Díaz, H. 1980. The mole crab *Emerita talpoida* (Say): a case of changing life history pattern. *Ecological Monographs* 50: 437-456.

Fabricius, J. C. 1798. *Supplementum Entomologiae Systematicae*. Proft et Storch, Hafniae. 572 pp.

Fausto-Filho, J. 1975. Quinta contribuição ao inventário dos crustáceos decápodos marinhos do nordeste brasileiro. *Arquivos de Ciências do Mar* 14: 1-35.

Hadfield, M., and M. Strathmann. 1996. Variability, flexibility and plasticity in life histories of marine invertebrates. *Oceanologica Acta* 19: 323-334.

Hernández, P. 2001. Producción y rendimiento reproductivo en *Petrolisthes granulatus* (Decapoda, Anomura, Porcellanidae) en diferentes localidades del norte de Chile: una comparación latitudinal. *Investigaciones Marinas* 29: 73-81.

———, and S. Palma. 2003. Fecundidad, volumen del huevo y rendimiento reproductivo de cinco especies de porcelánidos intermareales del norte de Chile (Decapoda, Porcellanidae). *Investigaciones Marinas* 31: 35-46.

Hines, A. H. 1982. Allometric constraints and variables of reproductive effort in brachyuran crabs. *Marine Biology* 69: 309-320.

———. 1988. Fecundity and reproductive output in two species of deep-sea crabs *Geryon fenneri* and *G. quinquegens* (Decapoda: Brachyura). *Journal of Crustacean Biology* 8: 557-562.

Holthuis, L. B. 1981. Description of three new species of shrimps (Crustacea: Decapoda: Caridea) from Pacific Islands. *Proceedings of the Biological Society of Washington* 94: 787-800.

- Ituarte, R. B., C. Bas, T. A. Luppi, and E. D. Spivak. 2006. Interpopulational differences in the female reproductive cycle of the southwestern Atlantic estuarine crab *Chasmagnathus granulatus* Dana, 1851 (Brachyura: Grapsoidae: Varunidae). *Scientia Marina* 70: 709-718.
- , E. D. Spivak, and K. Anger. 2007. Intraspecific variability in life-history traits of a freshwater shrimp, *Palaemonetes argentinus*. *International Journal of Limnology* 43: 293-302.
- Jones, M. B., and M. J. Simons. 1983. Latitudinal variation in reproductive characteristics of a mud crab *Helice grassa* (Grapsidae). *Bulletin of Marine Science* 33: 656-670.
- Kingsley, J. S. 1878. List of Decapod Crustacea of the Atlantic Coast, whose range embraces Fort Macon. *Proceedings of the Academy of Natural Sciences of Philadelphia* 30: 316-328.
- Kuris, A. M. 1991. A review of patterns and causes of crustacean brood mortality. In: A. Wenner and A. Kuris (eds.), *Crustacean Egg Production*. A.A. Balkema/Rotterdam/Brookfield, Rotterdam: 117-141.
- Kyomo, J. 2000. Intraspecific variation of reproductive strategies of the crab *Sesarma intermedia*: a consequence of habitat variations. *Bulletin of Marine Science* 66: 157-171.
- Laptikhovsky, V. 2006. Latitudinal and bathymetric trends in egg size variation: a new look at Thorson's and Rass's rules. *Marine Ecology* 27: 7-14.
- Lardies, M. A., and J. C. Castilla. 2001. Latitudinal variation in the reproductive biology of the commensal crab *Pinnaxodes chilensis* (Decapoda: Pinnotheridae) along the Chilean coast. *Marine Biology* 139: 1125-1133.
- , and I. S. Wehrtmann. 1996. Aspects of the reproductive biology of *Petrolisthes laevigatus* (Guérin, 1835) (Decapoda, Anomura, Porcellanidae). Part I: Reproductive output and chemical composition of eggs during embryonic development. *Archive of Fishery Marine Research* 43: 121-135.
- , and ———. 1997. Egg production in *Betaeus emarginatus* (H. Milne Edwards, 1837) (Decapoda: Alpheidae): fecundity, reproductive output and chemical composition of eggs. *Ophelia* 46: 165-174.
- , and ———. 2001. Latitudinal variation in the reproductive biology of *Betaeus truncatus* (Decapoda: Alpheidae) along the Chilean coast. *Ophelia* 55: 55-67.
- , M. H. Medina, and J. A. Correa. 2008. Intraspecific biogeographic pattern breakage in the snapping shrimp *Betaeus emarginatus* caused by coastal copper mine tailings. *Marine Ecology Progress Series* 358: 203-210.
- Mantelatto, F. L., J. M. Martinelli, and R. B. Garcia. 1999. Fecundity of *Hippolyte obliquimanus* Dana, 1852 (Decapoda, Caridea, Hippolytidae) from the Ubatuba region, Brazil. In: F. R. Schram and J. C. von Vaupel Klein (eds.), *Crustaceans and the Biodiversity Crisis – Proceedings of the Fourth International Crustacean Congress*, Amsterdam, The Netherlands, July 20-24, 1998. J. Brill, Leiden 1: 691-700.
- , M. A. Scelzo, and C. Tudge. 2009. Morphological and morphometric appraisal of the spermatophore of the southern hermit crab *Isocheles sawayai* Forest and Saint-Laurent, 1968 (Anomura: Diogenidae), with comments on gonopores in both sexes. *Zoologischer Anzeiger* 248: 1-8.
- , L. C. Fernandes-Góes, M. Z. Fantucci, R. Biagi, L. M. Pardo and J. M. Góes. 2010. A comparative study of population traits between two South American populations of the striped-legged hermit crab *Clibanarius vittatus*. *Acta Oecologica* 36: 10-15.
- Martin, J. W., and G. E. Davis. 2001. An updated classification of the recent Crustacea. *Natural History Museum of Los Angeles County, Science Series* 39: 1-124.
- Mashiko, K. 1987. Sexual differences in body size and growth of a freshwater prawn, *Macrobrachium nipponense*, in captivity. *Japanese Journal of Ecology* 37: 71-73.
- Mathews, L. M., C. D. Schubart, J. E. Neigel, and D. L. Felder. 2002. Genetic, ecological, and behavioural divergence between two sibling snapping shrimp species (Crustacea: Decapoda: Alpheus). *Molecular Ecology* 11: 1427-1437.
- Meiri, S., and T. Dayan. 2003. On the validity of Bergmann's rule. *Journal of Biogeography* 30: 331-351.
- Milne-Edwards, A. 1878. Description de quelques espèces nouvelles de Crustacés provenant du voyage aux îles du Cap-Vert de MM. Bouvier et de Cessac. *Bulletin des Sciences, par la Société Philomatique de Paris* 7(2): 225-232.
- . 1891. Crustacés. Mission Scientifique du Cap Horn, 1882-1883. Vol. 6, Zoologie. Gauthier-Villars et fils. Paris. 54 pp.
- Milne Edwards, H. 1837. *Histoire Naturelle des Crustacés*. L'Institute, Paris 5: 225.
- Miranda, I., A. L. Meireles, R. Biagi, and F. L. Mantelatto. 2006. Is the abundance of the red brocade hermit crab *Dardanus insignis* (Decapoda: Anomura: Diogenidae) in the infralittoral region of southern Brazil determined by reproductive potential? *Crustacean Research* 6: 45-55.
- Negreiros-Franzoso, M. L., E. Barba, A. J. Sanchez, A. Fransozo, and A. Ráz-Guzmán. 1996. The species of *Hippolyte* Leach (Crustacea, Caridea, Hippolytidae) from Términos Lagoon, southwestern Gulf of Mexico. *Revista Brasileira de Zoologia* 13: 539-551.
- Nielsen-Muñoz, V., and J. Cortés. 2008. Abundancia, biomasa y floración de *Thalassia testudinum* (Hydrocharitaceae) en el Caribe de Costa Rica. *Revista de Biología Tropical* 56: 175-189.
- Orton, J. H. 1920. Sea-temperature, breeding and distribution in marine animals. *Journal of the Marine Biological Association of the United Kingdom* 12: 339-366.
- Pandian, T. J. 1970. Ecophysiological studies on the developing eggs and embryos of the European lobster *Homarus gammarus*. *Marine Biology* 5: 154-167.
- Pavanelli, C. A. M., E. C. Mossolin, F. L. Mantelatto. 2008. Reproductive strategy of the snapping shrimp *Alpheus armillatus* H. Milne-Edwards, 1837 in the South Atlantic: fecundity, egg features, and reproductive output. *Invertebrate Reproduction and Development* 52: 123-130.
- , and F. L. Mantelatto. 2010. Maternal investment in egg production: environmental and population-specific effects on offspring performance in the snapping shrimp *Alpheus nuttingi* (Schmitt, 1924) (Decapoda, Alpheidae). *Animal Biology* 60: 237-247.
- Roy, K., and K. K. Martien. 2001. Latitudinal distribution of body size in north-eastern Pacific marine bivalves. *Journal of Biogeography* 28: 485-493.
- Sastry, A. N. 1983. Ecological aspects of reproduction, pp. 179-270. In: F. J. Vernberg and W. B. Vernberg (eds.), *The Biology of Crustacea*, vol. 8. Environmental Adaptations. Academic Press, New York.
- Schmitt, W. L. 1924. The Macruran, Anomuran and Stomatopod Crustacea. *Bijdragen tot de kennis der Fauna van Curaçao. Resultaten eener reis van Dr. C.J. van der Horst in 1920. Bijdragen tot de Dierkunde* 23: 61-81.
- Steele, D. H. 1977. Correlation between egg size and development period. *American Naturalist* 111: 371-372.
- , and V. J. Steele. 1975. Egg size and duration of embryonic development in Crustacea. *Internationale Revue der Gesellschaft für Hydrobiologie* 60: 711-715.
- Strathmann, R. R. 1977. Egg size, larval development, and juvenile size in benthic marine invertebrates. *American Naturalist* 111: 373-376.
- Terossi, M., and F. L. Mantelatto. 2010. Sex ratio, reproductive period and seasonal variation of the gonochoric shrimp *Hippolyte obliquimanus* (Caridea: Hippolytidae). *Marine Biology Research* 6: 213-219.
- , L. S. López Greco, and F. L. Mantelatto. 2008. *Hippolyte obliquimanus* (Decapoda: Caridea: Hippolytidae): a gonochoric or hermaphroditic shrimp species? *Marine Biology* 154: 127-135.
- , J. A. Cuesta, I. S. Wehrtmann, and F. L. Mantelatto. (in press). Revision of the larval morphology (Zoea I) of the family Hippolytidae (Decapoda, Caridea), with a description of the first stage of the shrimp *Hippolyte obliquimanus* Dana, 1852. *Zootaxa*.
- Thorson, G. 1950. Reproductive and larval ecology of marine invertebrates. *Biological Reviews of the Cambridge Philosophical Society* 25: 1-45.
- Torati, L. S., and F. L. Mantelatto. 2008. Uncommon mechanism of eggs incubation in the endemic southern hermit crab *Loxopagurus loxochelis*: how is this phenomenon related to egg production? *Acta Zoologica* 89: 79-85.
- Tsakamoto, R. Y. 1981. *Bopyrina ocellata* (Czerniavsky, 1868), isópode parasita assinalada pela primeira vez no Atlântico Sul (Epicaridea, Bopyridae). *Morfologia, desenvolvimento e distribuição geográfica*. *Ciência e Cultura* 33: 394-401.
- Turner, R. L., and J. M. Lawrence. 1979. Volume and composition of echinoderm eggs: implications for use of eggs size in life-history models. In: S. E. Stancky (ed.), *Reproductive Ecology of Marine Invertebrates*. Belle W. Baruch Institute 25-40.
- Udekem d'Acoz, C. d'. 1997. Redescription of *Hippolyte obliquimanus* Dana, 1852, and comparison with *Hippolyte williamsi* Schmitt, 1924 (Decapoda, Caridea). *Crustaceana* 70: 469-479.



- Vernberg, F. J. 1962. Comparative physiology: latitudinal effects on physiological properties of animal populations. *Annual Review of Physiology* 24: 517-546.
- Wear, R. G. 1974. Incubation in British decapod Crustacea, and effects of temperature on the rate and success of embryonic development. *Journal of the Marine Biological Association of the United Kingdom* 54: 745-762.
- Wehrmann, I. S. 1990. Distribution and reproduction of *Ambidexter panamense* and *Palaemonetes schmitti* in Pacific Costa Rica (Crustacea, Decapoda). *Revista de Biología Tropical* 38: 327-329.
- , and G. Andrade. 1998. Egg production in *Heterocarpus reedi* from northern Chile, with a comparison between iced and living females. *Ophelia* 49: 71-82.
- , and G. Kattner. 1998. Changes in volume, biomass, and fatty acids of developing eggs in *Nauticaris magellanica* (Decapoda: Caridea): a latitudinal comparison. *Journal of Crustacean Biology* 18: 413-422.
- , and M. A. Lardies. 1999. Egg production of *Austropandalus grayi* (Decapoda, Caridea, Pandalidae) from the Magellan Region, South America. *Scientia Marina* 63: 325-331.
- , and G. A. López. 2003. Effects of temperature on the embryonic development and hatchling size of *Betaeus emarginatus* (Decapoda: Caridea: Alpheidae). *Journal of Natural History* 37: 2165-2178.
- Woodward, I. O., and R. W. G. White. 1981. Effects of temperature and food on the fecundity and egg development rates of *Boeckella symmetrica* Sars (Copepoda: Calanoida). *Australian Journal of Marine and Freshwater Research* 32: 997-1001.
- Yam, R. S. W., and D. Dudgeon. 2005. Inter- and intraspecific differences in the life history and growth of *Caridina* spp. (Decapoda: Atyidae) in Hong Kong streams. *Freshwater Biology* 50: 2114-2128.
- Yoshino, K., S. Goshima, and S. Nakao. 2002. Temporal reproductive patterns within a breeding season of the hermit crab *Pagurus filholi*: effects of crab size and shell species. *Marine Biology* 141: 1069-1075.
- Young, P. S. 1998. *Catalogue of Crustacea of Brazil*. Série Livros 6. Museu Nacional, Rio de Janeiro. 717 pp.

RECEIVED: 5 October 2009.

ACCEPTED: 28 January 2010.
